# Supplementary material for: Internalization of Exogenous Cystatin F Supresses Cysteine Proteases and Induces the Accumulation of Single-chain Cathepsin L by Multiple Mechanisms
Source: PubMed Central journal article supplement — J Biol Chem. 2011 Sep 28;286(49):42082–90. doi: 10.1074/jbc.M111.253914 (PMC3234946; doi:10.1074/jbc.m111.253914), 2011-09-28
Supplement: supp_M111.253914_jbc.M111.253914-1.pdf [file supp_M111.253914_jbc.M111.253914-1.pdf]

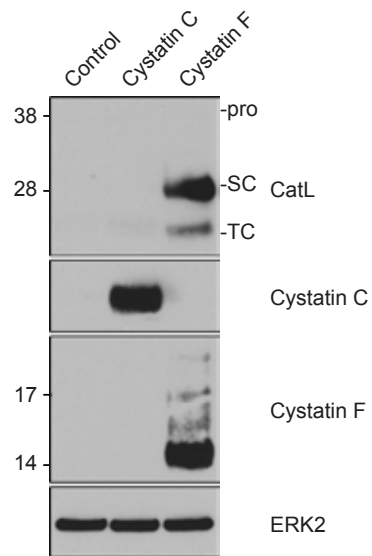

#### SUPPLEMENTAL FIGURE S1

**CatL processing in BMM is not altered by exposure to cystatin C.** BMM were exposed to a solvent control (Control) or an equal molar concentrations of cystatin C or cystatin F (20nM) for 48hrs. Internalization of cystatin C and F were assessed by separating cell extracts on SDS-PAGE followed by immunoblot. ERK2 expression was used to assess total protein loading.
