# Supplementary material for: Internalization of Exogenous Cystatin F Supresses Cysteine Proteases and Induces the Accumulation of Single-chain Cathepsin L by Multiple Mechanisms
Source: PubMed Central journal article supplement — J Biol Chem. 2011 Sep 28;286(49):42082–90. doi: 10.1074/jbc.M111.253914 (PMC3234946; doi:10.1074/jbc.m111.253914), 2011-09-28
Supplement: supp_M111.253914_jbc.M111.253914-2.pdf [file supp_M111.253914_jbc.M111.253914-2.pdf]

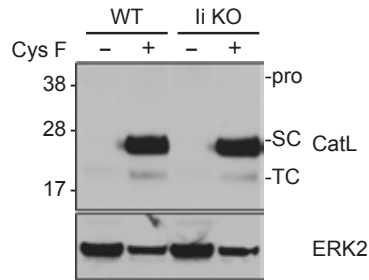

SUPPLEMENTAL FIGURE S2

**CatL changes are not dependent on the presence of the invariant chain.** BMM from invariant chain knockout (Ii KO) or littermate control (WT) cells were cultured with 20nM cystatin F for 48h. SDS-PAGE gels were run under reducing conditions.
