# Supplementary material for: Internalization of Exogenous Cystatin F Supresses Cysteine Proteases and Induces the Accumulation of Single-chain Cathepsin L by Multiple Mechanisms
Source: PubMed Central journal article supplement — J Biol Chem. 2011 Sep 28;286(49):42082–90. doi: 10.1074/jbc.M111.253914 (PMC3234946; doi:10.1074/jbc.m111.253914), 2011-09-28
Supplement: supp_M111.253914_jbc.M111.253914-3.pdf [file supp_M111.253914_jbc.M111.253914-3.pdf]

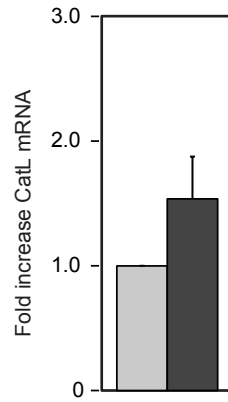

SUPPLEMENTAL FIGURE S3

**CatL expression does not significantly change following exposure to cystatin F.** RNA was extracted from untreated BMM (light grey) or following exposure to 20 nM cystatin F (dark grey) for 48hrs. Data represents fold increase of CatL after normalizing to HPRT and GAPDH. (p=0.094). Data are representative of 5 independent experiments.
