# Supplementary material for: Internalization of Exogenous Cystatin F Supresses Cysteine Proteases and Induces the Accumulation of Single-chain Cathepsin L by Multiple Mechanisms
Source: PubMed Central journal article supplement — J Biol Chem. 2011 Sep 28;286(49):42082–90. doi: 10.1074/jbc.M111.253914 (PMC3234946; doi:10.1074/jbc.m111.253914), 2011-09-28
Supplement: supp_M111.253914_jbc.M111.253914-4.pdf [file supp_M111.253914_jbc.M111.253914-4.pdf]

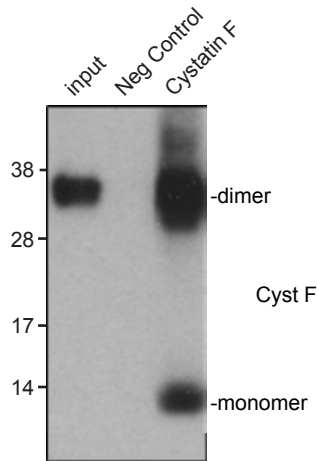

#### SUPPLEMENTAL FIGURE S4

**Internalized cystatin F converts to active monomeric form.** Cystatin F KO BMDC were exposed to a solvent control (Neg Control) or cystatin F (20nM) for 48 hrs (middle and right lanes). Conversion of internalized cystatin F was assessed by separating cell extracts on SDS-PAGE run under non-reducing conditions, followed by immunoblot. An aliquot of the BMDC culture medium after cystatin F addition was run in parallel to indicate the exclusively dimeric nature of the 'input' cystatin F.
