# Supplementary material for: Internalization of Exogenous Cystatin F Supresses Cysteine Proteases and Induces the Accumulation of Single-chain Cathepsin L by Multiple Mechanisms
Source: PubMed Central journal article supplement — J Biol Chem. 2011 Sep 28;286(49):42082–90. doi: 10.1074/jbc.M111.253914 (PMC3234946; doi:10.1074/jbc.m111.253914), 2011-09-28
Supplement: supp_M111.253914_jbc.M111.253914-5.pdf [file supp_M111.253914_jbc.M111.253914-5.pdf]

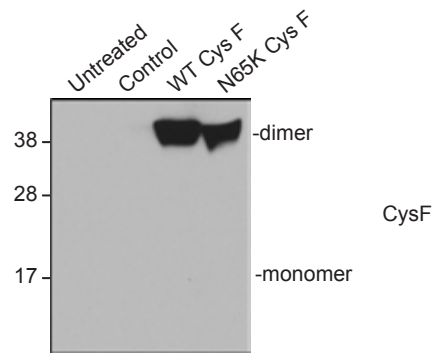

SUPPLEMENTAL FIGURE S5

**Equal concentrations of WT and N65K mutant cystatin F.** Supernatant from 293T cells transfected with an empty vector control (Control), wildtype cystatin F (WT CysF), or a cystatin F point mutant (N65K Cys F) were collected prior to culture with BMM. Immunoblot from a nonreducing SDS-PAGE gel shows dimeric cystatin F (dimer).
